# Supplementary material
Source: ML conference proceedings conference paper supplement (https://aclanthology.org/2021.dravidianlangtech-1.48)
Supplement: Software [file labels-levelc.xlsx]

## Sheet: labels-levelc
15923	OTH
60133	GRP
83681	IND
65507	OTH
34263	IND
49139	IND
58995	GRP
88490	IND
46444	IND
60587	IND
44546	GRP
51628	IND
40110	GRP
15998	OTH
96457	GRP
70841	IND
46139	GRP
40386	GRP
98916	OTH
32190	OTH
27550	IND
24040	GRP
73516	IND
88905	IND
42112	GRP
37740	IND
72405	IND
47445	OTH
27158	OTH
17183	IND
42325	OTH
15180	IND
58026	IND
81352	IND
33133	IND
91036	GRP
22882	IND
40842	IND
73612	IND
15815	GRP
24049	IND
79204	GRP
46229	GRP
34669	GRP
34575	GRP
20357	IND
52445	IND
10991	IND
57135	GRP
72369	IND
42192	GRP
43587	IND
41553	GRP
62986	OTH
70051	GRP
73642	IND
11645	GRP
72274	OTH
21524	IND
84579	GRP
59519	GRP
51386	IND
10918	OTH
57541	IND
25125	IND
61295	OTH
53351	IND
25463	GRP
85613	GRP
85886	OTH
54621	IND
80397	GRP
67926	GRP
41588	GRP
51948	OTH
28196	IND
50376	OTH
45304	IND
27228	GRP
57326	OTH
88221	GRP
97610	OTH
63048	IND
30075	IND
60466	GRP
25685	IND
16333	GRP
78417	IND
51525	IND
84550	GRP
23530	IND
57284	GRP
59700	IND
13433	GRP
80197	IND
79309	GRP
47696	GRP
55633	IND
87934	GRP
27455	GRP
83466	IND
48657	GRP
86611	GRP
12193	GRP
63985	IND
20522	IND
70324	GRP
89329	OTH
11100	OTH
83240	GRP
81890	IND
72037	IND
94607	GRP
72531	OTH
98575	IND
58342	IND
39429	IND
18786	OTH
67049	IND
98216	OTH
37649	IND
59751	IND
92215	GRP
22311	GRP
75125	OTH
21354	IND
22594	GRP
33394	IND
56513	OTH
59691	GRP
41997	IND
56637	IND
97410	IND
77746	IND
17704	GRP
61674	GRP
39860	IND
79934	IND
55048	OTH
76833	OTH
55832	GRP
32056	OTH
67841	IND
94427	OTH
96594	GRP
62689	IND
35968	GRP
14516	GRP
15866	IND
57185	GRP
91430	OTH
29203	IND
27913	IND
46410	IND
16856	GRP
89200	IND
45269	GRP
15437	GRP
91472	IND
98531	GRP
98685	GRP
31665	GRP
38732	GRP
46983	OTH
22067	IND
79756	GRP
99563	IND
23542	GRP
83416	OTH
67418	IND
58632	IND
35612	IND
96905	IND
79778	IND
90328	IND
71350	IND
43782	IND
58287	IND
32061	IND
63129	IND
74797	IND
25177	OTH
87428	IND
39400	GRP
88745	IND
70443	GRP
90327	IND
65545	GRP
58543	IND
79222	GRP
72401	IND
31354	OTH
29008	OTH
41590	IND
72523	GRP
14640	OTH
74909	IND
96397	GRP
34030	GRP
29113	GRP
11286	IND
41821	IND
76379	GRP
52080	GRP
51762	IND
71592	IND
78688	GRP
76135	IND
30778	IND
22569	GRP
48938	IND
41438	GRP
73439	GRP
