# Supplementary material
Source: ML conference proceedings conference paper supplement (https://aclanthology.org/2021.dravidianlangtech-1.48)
Supplement: Software [file testset-levelc.xlsx]

## Sheet: testset-levelc
id tweet
15923 #WhoIsQ #WheresTheServer #DumpNike #DECLASFISA Democrats Support Antifa	Muslim Brotherhood	MS13	ISIS	Pedophilia	Child Trafficking	Taxpayer Funded Abortion’s	Election Fraud	Sedition And Treason!!! #LockThemAllUp #WWG1WGA #QAnon ⁦@USER URL
60133 #NoPasaran: Unity demo to oppose the far-right in #London – #antifa #Oct13 — Enough is Enough! URL
83681 . . . What the fuck did he do this time?
65507 @USER Do you get the feeling he is kissing @USER behind so he can humiliate him later?
34263 #StopKavanaugh he is liar like the rest of the #GOP URL
49139 "@USER @USER Put DeLauro in a police lineup identifying the bag lady"" - she would be picked everytime! She has to be proof either Conn voters are incompetent to vote or she is part of a vast voter fraud conspiracy! No one votes for a woman that gross!"""
58995 @ ALL FAMILY/FRIENDS	do not tell me bad shit that your bf/gf did to you just to go right back to them!!!
88490 #ChristineBlaseyFord is your #Kavanaugh accuser... #Liberals try this EVERY time... #ConfirmJudgeKavanaugh URL
46444 #ArianaAsesina? Is that serious?! Holy shit	please your fucking assholes	don't blame someone for the death of other one. She is sad enough for today	don't you see? It isn't fault of none	he had an overdose and died. End. Stop wanting someone to blame	fuckers.
60587 @USER How is she hiding her ugly personality. She is the worst.
44546 @USER @USER @USER @USER @USER @USER @USER @USER @USER I’m shocked to learn human traffickers had guns. Some probably illegal too. CA needs more gun control. But don’t worry about the actual crime. The pic of black guns is worse.
51628 #Conservatives @USER - You're a clown! URL
40110 #Kids Beating #Paraplegic #Trump #Boy! #Left Teach Their #Children Hate Violence! #schools #teachers #Democrats #Liberals #WalkAway #Moms #Mother #NEA #teachthemyoung #Christian #Catholic #Jews #Evangelicals #family #BlackWomen #BlackTwitter #Blacks #News #Media #Disabled #MAGA URL
15998 *gets all the bitches*
96457 #Antifa: Take note of how to protest with civility. This is why socialism (aka communism) will never win. It is inherently evil and unsustainable. URL
70841 @USER omg is he for real ?!?!!??????) this happened in peru like 40 years ago and the Inti devaluated so fucking much that they had to comoletely change the coin system because our money was worthless i-
46139 #Conservatism101 It's not about our disagreements with #Conservatives. Its that Conservatives can't debate honestly	and they have no integrity. Whatever gets them thru today	is all that matters to them. They're fundamentally dishonest people. URL
40386 @USER @USER @USER @USER Then why aren’t there so many shootings in Virginia? Jacksonville shooter got his guns IN MARYLAND!! Among the poster children for gun control! What good did that do?! You’re full of crap.
98916 #ANTIFA are bedfellows with The Democratic Socialists of America (DSA) who #JamesOKeefe has exposed as being inserted throughout government	attempting to bring down #America #Trump #MAGA🇺🇸 #DeepState URL
32190 @USER Antifa has TS level influence. It's scary.
27550 @USER I have three accounts. Two quasi-anonymous	and one completely anon. And if twitter ever bans one of the quasi-anon	I'll make two anon accounts and tweet the most insane shit. I will drown twitter in bullshit. If one of those is banned	I'll make even more.
24040 #Liberals are so pathetic! INNOCENT UNTIL PROVEN GUILTY mean much? #Democrats should look at their own party if they need a rapist to hang! #KavanaughIsInnocent #WalkAwayFromDemocrats. #LiberalLies are straight from the Pitts of HELL 🔥 URL
73516 $10 Million reallocated from FEMA to ICE. This guy gives zero shits about anyone not named Trump. If you’re in the mid Atlantic	get out. Now. URL
88905 #FortniteBattleRoyale #XboxShare @USER Please ban this cheating scum. he is literally invisible URL
42112 #SesameStreet #BertandErnie the conversation about this is so unattractive. The creator says he didn't create a character gay and he is being attacked.
37740 #SerenaWilliams is so full of herself...she is just as painful to watch as to listen to...
72405 #ColinKapernaeck has done nothing but sit on his ass and complain. It’s time black people and die hard white liberals	who think they are down with the cause aka @USER to wake the heck up or STFU! Colin is not a Civil Rights hero or martyr. No where near it.
47445 . JEFF SESSIONS: ‘LISTEN TO THE ACLU	ANTIFA	BLACK LIVES MATTER’ IF YOU WANT MORE CHICAGO SHOOTINGS . URL
27158 Amazon will ship live Christmas trees to your door — but will they stay and put on the damn lights? URL
17183 @USER I BET she is a lot safer when she has sex now tho ? Or she wouldn’t have just one but a few kids . Why cant moms get dicked down too ?
42325 #Conservatives Govt ' @USER made my life hell': whistleblowers say they were threatened by regulator; I thought this Govt promised to protect whistleblowers? URL
15180 #FortniteBattleRoyale #XboxShare @USER Please ban this cheating scum. he is literally invisible URL
58026 #MAGA #Qanon #GreatAwakening #inners #WWG1WGA #NowComesThePain #WalkAway #GoodbyeDemocrats Ellison Accuser Says She's Been Sidelined By Her Own Party URL
81352 #BoycottNFL .@USER You are dead to me. @USER @USER URL
33133 @USER #WalkAwayFromAllDemocrats Michelle was there 8 years and we sure don't need any more bad advice from her now. We have a new Sheriff in Town	who's #MAGA. Get out and VOTE - ALL COLORS	ALL GENDERS (AKA) ALL AMERICANS!!! URL
91036 #BlaseyFord It’s so comical that liberals always want it both ways first women need to be treated as equals but when it comes to Ford testifying they say it’s unfair to have more men asking her questions. Which is it Dems are women equal or should we receive special treatment?
22882 #Ted always has a feel for the most appropriate public behavior. But	often	he is unable to control himself. #GOPDysfunction URL
40842 @USER Stick to Comedy ... You weren't that funny yo start with	but that political commentary of yours is pathetic !!!
73612 @USER #Holder needed to be impeached
15815 #BelieveAllWomen just when I think things can't get dumber.. this happens.. liberals probably don't realize this because they are children but this isn't equality. How about we treat women an men the same.. pretty sure that'll have better results for culture
24049 #SierraBurgessIsALoser She is me when my phone dings 😂
79204 @USER #metoo are all racist!
46229 #GOP still acting like the wimps they are.. What!? they haven’t yet realized that Liberals will hate them regardless of their sentiments.. Either Republicans are just too stupid to get out of their own way or they’re just tilted to far left.. #ConfirmKavanaughNow
34669 #DregsOfSociety ??? #Deplorables Liberals usually dehumanize those they want to exterminate later URL
34575 #EmmyAwards2018 - Ratings tank as expected. Who can possibly stand to watch so many liberals in one place at one time.
20357 @USER #Gutierrez has always been nothing more than a #racebaiter
52445 #Elitist #Actors #NBC #Liberals of #Dems in #Hollywood at the #Emmy Awards a 'toothless' #NBC self-promotion onslaught peppered with #MeToo cracks but it was planned	staged and okay because they are #Democrats #Socialist #Liberals of the #Left #WALKAWAY ! URL
10991 #DrFord #DearProfessorFord Is a FRAUD Female @USER group paid for and organized by #GeorgeSoros URL
57135 #BlueWave #DumpTrump …give my love 2	or cooperate/compromise w/	conservatives/Trump supporters who constantly vilify marginalized groups	who constantly attack women’s rights 2 make choices about their own bodies	…
72369 #NightMayor 's DT cycle track can easily open Antifa tennis courts inside Crescent Heights until we are able to trash Nenshi’s communist vape shop!
42192 #ArunJaitleyStepDown He is most shameless #FM in history of India and audacity and shamelessness with which is lies in public is disgrace to post.
43587 "#Conservatives £2 bn Housing on-trick @USER - What a crock of sh#te""! @USER #HousingCrisis URL"
41553 #Coupdetat of #Spain in #Catalona. #Spain is a #fakedemocracy @USER @USER @USER @USER @USER @USER @USER @USER @USER @USER @USER @USER @USER @USER @USER #cddr #shameonSpain #WakeupEurope @USER @USER URL
62986 #Liberalismisamentaldisorder	but it is also a danger to our country. #Liberals are showing themselves to be utterly hateful. They do not CARE about TRUTH	they only care about POWER.
70051 @USER These are all coranated attacks from idiot loons! They will get worse much worse before the election! Can u imagine idiots who want to get rid of the economy and their 401 along with interest rates just because he is not a polished politician? Idiots!
73642 @USER @USER Awwww she is so stinking cute! How old is she now?
11645 #JoinTheFight Join the fight against American Communists... Democrats and Liberals have taken this crap to the edge and there is no coming back. They are openly promoting the Destruction of AMERICA. #JoinTheFightAgainstCommunism URL
72274 @USER @USER has stated that any talk of Zionist involvement in 9/11 is metaphysical masturbation because he is a disinformation agent taking advantage of people of lesser intellect. He should be ashamed of himself but he’s not because he’s #Zionel
21524 #Khaleesi kinda watching #HIAC ! Wtf does she think she is	a person? Pffft pathetic URL
84579 And🤷🏽‍♂️ females b on the same shit URL
59519 #DeclassifyDocuments I love watching liberals like Maria squirm. #Outnumbered
51386 #PoliticsInFocus Look Donald! You are only a duck	stop patronizing me! URL
10918 #CarbonTax works and will put tons more money BACK INTO Canadian pockets. .@USER .@USER .@USER .@USER Part of why Trudeau won in 2015 was campaigning on a national carbon tax. Conservatives died then. They want another death in 2019...we will oblige. URL
57541 Antonia Evans was either sex trafficked or cremated.
25125 #TheView stormy was in trapped by a dollar bill in her face poor pornstar but no worries the Democratic Party she is the leader of
61295 And these entertainment agencies just gonna have to be an ass about it. URL
53351 #Trump Really	everything Trump does is another piece of evidence for obstruction of justice. He is a talking crime machine.
25463 #DisarmThem? This goes to show how moronic Antifa types are	because this is a good way to encourage some dumbass to rightfully get speedrocked. Open carry users practice weapon retention. Gun grabs will go very badly for you if you try. You will get shot	so don't do it. #2A URL
85613 #ChristineBFord #LiberalsAreDesperate @USER every time liberals don't get there way they cry racism or sexual assault. Hard to believe
85886 #CincinnatiEnquirer steps into #Gun Control FINALLY. Took a #MassShhoting on their damn door step for their #editors to wake up	but better late than never. URL
54621 !!!!bitch i’m fucking coming back URL
80397 #Liberals Are Reaching Peak Desperation To Call On #PhillipRuddock To Talk With #Turnbull To Convince Him To Help with #WentworthVotes 18 Sept 2018 @USER #Auspol #LNP #NSWpol @USER @USER @USER #LNPMemes URL
67926 #Democrat controlled city with strict gun control laws and @USER wants to blame the #GOP Um	isn’t it you rich #Democrats trying to keep the blacks in poverty? #WalkAway URL
41588 @USER Got to love that the people making the laws tend to know nothing about the subject they're making the law for. You should hear some of the gun control laws people try to pass here in the states.
51948 @USER #WalkAWayFromCatholicism it is a corrupt to the core and become a giant autocratic pedophile ring.
28196 #CALIFORNIA PATRIOTS... especially those in #CA21 Obama/Soros are attempting to take this House seat to get control of Congress. Say no to TJ Cox. He is a shill Candidate fronted by the dastardly duo. Please get out and vote David Valadao for House	Dist 21! Follow @USER URL
50376 - When she takes her nigga name out her bio. URL
45304 #ArrestGeorgeSoros He Funds #DomesticTerrorists #Antifa URL
27228 #Conservatives Govt have run up debt in spite of austerity cuts while the rich have doubled their wealth. #inequality URL via @USER
57326 #CrowderConfronts continues to expose that the SJW bullies are paper tigers when conservatives fight back with truth and facts. #dontbeafraid #confrontwithtruth URL
88221 #BiggBossTelugu2 how many of you #KaushalArmy cum @USER fans... URL
97610 @USER @USER @USER Okay and? Anybody can go to Eredivise and score 15+ goals. Shit league. Bundesliga teams are competitive in euro competitions. Mexico hasn’t produced any talent like Pulisic in a long time. It’s okay	maybe you guys will one day.
63048 #Kalyani is a very stupid teenager. I totally despise her for the atrocities she is doing towards Aunty Anupriya. She blames her for her mom’s death. She should stop and listen to Anupriya side of the story before she makes vile accusation #TujhseHaiRaabta #ZeeTVSerials
30075 #Kalyani is a very stupid teenager. I totally despise her for the atrocities she is doing towards Aunty Anupriya. She blames her for her mom’s death. She should stop and listen to Anupriya side of the story before she makes vile accusation #TujhseHaiRaabta #ZeeTVSerials
60466 #Christian #America – If we go by #Trump’s example	where liberals support open borders	I guess conservatives support school shootings. Please explain how this makes America great again.
25685 @USER @USER @USER She is the most disingenuous person in the Senate. If she was my Senator I would hide in shame after her despicable behavior in the SCOTUS hearings.
16333 #Democrats #Liberals you are being #threatened by #Armed #Nazis and you talk about #disarmament of yourselves and of #Disconnection from the #Military #Lifestyle ? You should #broadcast your #Armory and #killSkills #RightFuckingNOW URL
78417 699. Just wanted to tell you you should Hang Out With Me More. i think it’ll be fun! Also	lmao dick for a tongue? So people can easily suck me off. HAHA kidding aside	i aint want a tongue as my dick that looks hella weird.. but my choice was weird to but WHATEVER
51525 #AVALANCHE I'm sorry! I see you! I love you! I was an asshole! You know how we are #maga
84550 #FF @USER he is an alien from the future 🙌🏻👽🌃 URL
23530 "#FamiliarWife JH-OMG	she is crazy WJ-Wait!....yes	I am interested in assistant manager Cha BH-You guys look like a good pair VO-Are you having some""? Just sit over here JH-Don't do it! WJ-Lets live our own life. Lets do it News-Collision on hwy	there is congestion JH-Woo-jin~ URL"
57284 #ThingsDarthVaderWouldNeverSay yup	white mask privilege at it's finest. Always trying to keep a black mask down #BlackLivesMatter #Qanon #Antifa #AlexJones #Infowars #StarWars #maytheforcebewithyou #thirdshiftzombies #Podcast #radio #WhiteSupremacy URL
59700 All I’m saying if we cool and you feel any type of way about me.. speak the fuck up.
13433 #Cuckservative Traitors Are Worse Than Fortnite Players URL #Conservatives #TriggerWarningRadio
80197 #Barbara Boxer If LIBERALS Want to Use RAPE as a Political Tactic! THEY Had Better Have Some HARD EVIDENCE! Her Word Isn't Evidence!!! Its Called HEARSAY . On that note	I Could Say ' YOU ' Cornered Me In A Bathroom	And put YOUR Hands All Over Me' 35 Years Ago. PROVE ME WRONG URL
79309 #ConstitutionDay It's very odd for the alt right conservatives to say that we are ruining the constitution just because we want #GunControlNow but they are the ones ruining the constitution getting upset because foreigners are coming to this land who are not White wanting to live
47696 #LiberalLogic #Kavanaugh looks predatory. Therefore he's guilty. #Liberals are DANGEROUS people who should not govern anyone or anything. URL
55633 #OrrinHatch I can’t believe this sexist	clueless	old fart gets to weigh in on another woman’s charges against a Supreme Court nominee. And he is spouting the same old nasty shit he spewed 20+ years ago against Anita Hill. His time’s up! Good riddance Neanderthal!
87934 4. (Part 2) Didn't have to think too hard to come up with Gabriel. They're a lizard themed	glitter bombing	antifa mech pilot using their superhero powers to take down corrupt logging companies. They're a buff lesbian with hearts on their uniform. Literally what's not to love?
27455 #Liberals / #Democrats THIS is what you stand for. If not	then #WalkAway URL
83466 #Beeto Just Demonstrated How To Lose An Election In #Texas URL #MAGA @USER #rkba @USER #DVC
48657 And have a bitch thinking you niggas have money and you tf don’t.
86611 #Dems are disgusting. They only believe women who accuse conservatives of abuse crimes. When liberals are accused	they ignore the accusations. URL
12193 #ChristineBlaseyFord is only being harassed by members of the Antifa the radical arm of the Democratic Party funded by George Soros. #VoteRedToSaveAmerica
63985 "50 Cent Calls Out Joe Budden's Bullshit"" On Instagram URL URL"
20522 #bb20 actually question why do people want Jc to win more than Angela? He has been way meaner	says the n word repeatly	makes fun of eating disorders	and sexually harasses houseguests.She is just as much as an underdog to win so dont use that excuse. #bb20 #tangela
70324 Alright let me get right with God bc Mother Nature is like fuck humans URL
89329 #Hillary and @ least 16 other #AngryDemocrats #WorldWarQ #WWG1WGA #MAGA #RedTsunami #AmericaFirst #WalkAway #Truth URL
11100 #Antifa is recruiting for a designated #terrorist organization URL
83240 #Hypocrites #DemocratsHateAmerica #LiberalismIsAMentalDisorder EVERYTHING LIBERALS TOUCH TURNS TO ABSOLUTE SHIT... URL
81890 @USER @USER As I have said the media and money Soros with dip shit Waters is creating a civil war.
72037 #Texas Ted Cruz campaign is sending people solicitations disguised as official looking county summons. Elderly residents have been confused by the notice to appear. He is so skeezy. URL
94607 Anyone who finds M*neta's behavior funny can fuck off and die
72531 #GoodMorningAmerica #TuesdayMotivation #Thankyou #FatherGod the #Americanpeople will begin to see the #truth about our #governmentcorruption @USER @USER @USER #mediaCorruption #NoRedaction #DeclassifyFISA #Declassification completely #Obama #HillaryClinton #Lies #Leakers #liberals URL
98575 @USER The difference between you and I as I stated before	and this inane asinine comment have solidified is I bring facts and truth	while all you have is lies and bullshit. Present a single shred of credible evidence to support a single thing you've just said. Lies is all you've got.
58342 @USER Damn I felt this shit. Why you so loud lol
39429 #MSNBC #Hardball @USER Bingo you are absolutely correct he cannot bring President Obama down. He can’t get over how President Obama humiliated him at the White House correspondents dinner and I can guarantee you that is a definite driver of his hate for President Obama
18786 #CnnIsFakeNews @USER @USER you wonder why your ratings suck... #cnnisajoke #FakeNews #MAGA URL
67049 "#JoeScarborough is a vile excuse for a journalist"". Here he is criticizing #Trump yet refuses to come clean about the death of an intern in his office. Stop talking about everyone else and start talking about YOUR INVOLVEMENT WITH #LORIKLAUSUTIS. @USER"
98216 "The Dregs of Society""... more LABELINGand DEHUMANIZING Conservatives.I suggest	WE	Conservatives keep OUR ammo dry and OUR guns loaded..If the Fascist Liberal Left THINK Conservatives WILL go quietly into internment camps or slaughtered in the streets they NEED a REALITY check. URL"
37649 #Feinstein you cant say anything truthful. You are a loers and liar. URL
59751 #Nigeria #Naija #9ja 'You are the most incompetent leader in Nigeria’s history' – Atiku blasts Buhari URL By championnewsng Via URL
92215 #Emmys Well	most of those ex-crackheads are liberals and Democrats; so ...
22311 @USER #Diversity only works when those joining the new group want to be a part of the team. #Islam hates every non-Muslim #Fail #Unicorns
75125 // SO WANT TO KICK TWITTERFUCK ASS.
21354 #FailedDemFeinstein should have quit decades ago. She is a disgrace. Feinstein blames GOP after Kavanaugh accuser stays mum	admits 'I can't say everything's truthful' URL
22594 @USER @USER @USER Fascism was also against liberals as is Antifa according to your meme.
33394 . a grown ass woman	probably 10 years older than me is currently spreading rumors rather than talking to me about it	nice work you got there satan ❤️
56513 #Conservatives don’t care what you post..it’s @USER propaganda.. URL
59691 #IDIOTS Is there nothing beneath them? Lol. What fools Liberals are! #MAGA #KAG 🇺🇸🇺🇸🇺🇸🇺🇸🇺🇸 URL
41997 @USER The kindest explanation is that he is tone-deaf. It's hard to feel kind when he and his ilk do this repeatedly.
56637 #AmazonPets Etta can be tricky to photograph because of her colouring	but she is BEAUTIFUL and she knows it. She is in charge	has first dibs on treats	and will shout for our attention whenever she comes in the house. She kills wild rabbits but hangs out in the hutch with ours. URL
97410 #GeoffreyOwens niggas don’t really understand...levels to career pursuits
77746 ...what about death _metal_? I want more death METAL... Tell me	you hateful Keebler Elf	WHERE CAN I HAVE MORE DEATH METAL???? URL
17704 #Kavanaugh is a disciple of Anthony Kennedy	who 🎁ed liberals w/3 unconstitutional opinions! He's Trump's con to con conservatives to 🤔ing #SCOTUS is moving right! Were @USER smart	they'd do everything to get BK the 🏁. But they won't! Idiots! #TuesdayThoughts URL
61674 #America ... tear down that #Wall! URL #tcot #partisanship #Trump #thewall #Borderwall #liberty #civilsociety #think #Conservatives #Democrats #Progressives #liberals #Independent #libertarians #GOP #DNC #CriticalThinking
39860 Am I a dickhead ???? Probably yes
79934 @USER 'cause everyone knows a real leader falls into a van like a sack of potatoes.....
55048 "#BoycottNike campaign must continue and grow Paying overseas staff $0.20 an hour is not okay because your staff is over there"". You are exploiting poor women/men in the world. This is more than Americans can stand. URL"
76833 "#NEWS Jeff Sessions: If you want more death	listen to the ACLU	Antifa	Black Lives Matter'"" URL #CNBC"""
55832 #David #Miliband #DavidMiliband flew away in #NewYork to be with the #US #Liberals #Democrats - had to flee #Corbynists hatred of Jews
32056 Anyway this game sucks :)
67841 #ibelieveblaseyford is liar she is fat ugly libreal #snowflake she sold her herself to get some cash !! From dems and Iran ! Why she spoke after #JohnKerryIranMeeting ?
94427 #Conservatives do NOT represent all Canadians. They are Authoritarian scum. #cdnpoli #onpoli URL
96594 "#Ford's attorney says she's receiving death threats and has had to move her family to safety"". Where's the proof that #Democrats #Antifa are not doing this to promote this circus?"""
62689 #scottgimple ruined #TheWalkingDead and now he is doing the same to #FearTWD . Hope the checks cash forever because he should never get another job. #AMC
35968 Another season for Tom Brady to give it to these niggas
14516 "#LifeIsButepu when you are black and can say the word nigga"". Feel me my niggas??? URL"
15866 #Austerity Low pay #TuitionFees Lack of housing Wages falling #UniversalCredit Unaffordable rents #NHS crisis Crap railways Empty shops #Brexit No deal exit from EU #Windrush #Grenfell In just 8 short years the @USER have completely fucked the UK
57185 @USER #ThoseThatAreTheLoudest are afraid	JUSTICE is coming #Bono is a scam just like the #ClintonFoundation #PedoWood #Haiti URL
91430 3 days before BBC Radio 2’s Festival in a Day	they decide to tell us that their headline act isn’t coming anymore. Thanks a lot	now I’ve paid a fortune to see a tonne of acts who are shit and who are of no interest to me 😑👍🏻
29203 #tytlive Trump needs to go because he is a danger to the country and the world. Any way we can get rid of him is good
27913 @USER #DavidHogg	you're nobody.
46410 #DeSantis=DeRacist	as bad a choice as he is	he “distanced” himself from the Prez’s comments today questioning any deaths in Puerto Rico from Hurricane Maria @USER @USER #whataputz
16856 @USER @USER I'll use that one the next time im in a gun control debate or in a debate about free speech or taxes. Yes you can choose to be irresponsible or choose not to be. I argue responsible. Whats wrong with that? Don't justify murder by saying it was never alive or its my right.
89200 @USER @USER Who the hell does he think he is?
45269 #LiberalismIsAMentalDisorder #Hypocrites #DemocratsHateAmerica #DemocratsAreDangerous EVERYTHING LIBERALS TOUCH TURNS TO ABSOLUTE SHIT. URL
15437 88% of these niggas have podcasts and YouTube channels dedicated to this and shit ain’t getting solved so URL
91472 Anytime I randomly bust out laughing it’s because I remembered some dumb shit Albria said 😭😭
98531 @USER @USER 😂 You do not like the Jewish people because you ALL claims they are holding all the money. Sound familiar? Your left wing libtard family is the family of the KKK. You do not hate Jews? That’s funny. Gun control; even funnier. Good luck
98685 #Liberals always up to dirty tricks to get their way. 👇👇 URL
31665 #Conservatives are more upset about #bertenernie being #gay than having a #sexualpredator in the @USER a hooker as @USER and a #rapist as #supremecourtjustice
38732 #Antifa protest in #Athens for the 5 years after the murder of Pavlos Fyssas by Golden Dawn. Their voters are complicit to their crimes. #KillahP URL
46983 #Conservatives just like old #Garbage bags blowing in the wind	here's an old garbage bag now... URL
22067 #Bakersfield is why we need gun control! Sorry for the victims other than the gunman himself I hope he rots in hell!
79756 #HonourSacrificeBoycottMatch I hope d human rights rats r happy!hope Sidhu is happy! I hope d liberals r happy! Let’s play cricket wth thm let’s thank thm 4 wht they r doing 2our soldiers Let’s celebrate our impotence funny a piddly little nation like pak is taking us 4 a ride
99563 #ConfirmKavanaugh ✅ #Kavanaugh #SCOTUS #POTUS45 #PresidentTrump #AmericaFirst #MAGA#KAG 🚫Anti #Trump liberal activist Accuser #Ford makes accusation but not willing to be subject 2 B question? Suffer the consequence of filing a false charge #LockHerUp URL
23542 #Resist traitors caught on video breaking our laws to further their #Communist #Socialism ways and slow down the #Trump agenda. They are the DC Chapter of Democrat Socialists of America. Forget anTifa	that is a distraction from the real Resistance. #MAGA URL
83416 #ChristineBlaseyFord was grinding #Kavanaugh at a party almost 40yrs ago.....You gotta love the age	of this ridiculous #MeToo movement Just swear #Kavanaugh in already and get this over with	before #liberals have an anxiety attack like 11/8/16 URL
67418 #CoryBooker is not a hero	he is an American traitor and should be treated as such. Arrest	prosecute	and carry out sentence. #KavanaughConfirmation URL via @USER
58632 100 Round Goon Bitch Is You Kiddin Me🤣
35612 @USER #MoreBS = MORE #BARRYSOETOROBULLSHIT
96905 #tytlive OMG how can a Latino faith based woman think that Trump is Christian. Wow	he is the poster child for immorality and hating Latinos
79778 @USER #Carrey is a #pervert himself!
90328 @USER nigga are you stupid your trash dont play with him play with your bitch 😂
71350 #NoOneAskMe But here's my opinion #offset keeping this beef up between #cardiB and @USER he know Cardi slow and believe everything he says.. She is his meal ticket. I just think #offset need to sit his ugly ass down.
43782 #ICYMI - Liberals' Favorite Myth That Obama Was a Law Professor Is Now Destroyed?! URL
58287 @USER To demonstrate how wholly incapable of carrying a thought to its logical conclusion she is?
32061 And she has a pet??? Fucking disgusting URL
63129 "#LiberalHypocrisy #TacoBell When Liberals ask why your against illegal immigration? Taco Bell Employee: No Habla Ingles!"" URL"
74797 #BlackInkCrewCHI lily they don’t hate you....you Hate you. You are your own worst enemy cause you let your anger get in the way I legit feel like Shes one of the kids I Work with at my job
25177 #JusticeForSoniasFather Mr Usman buzdar sb! please respond to Sonia Iqbal daughter of PTI counsellor from okara whose father was killed during elections by nawaz league killers. She is saying she will commit suicide in front of media. Where is justice?
87428 @USER - WORST POTUS. EVER!
39400 #Conservatives have no genetic ability to understand #hypocrisy or #irony. Right wing ideology gets ya all twisted in knots. #onpoli #Ontario #PartyOfYesteryear @USER #FraudNation URL
88745 #TheView #BothamJean I don't believe #AmyGuyger she is a lying pos! I live near a police station..I hope and pray a cop doesn't bust up in my house thinking it's his/hers and kills me..my God..we/people of color are police prey..we're always in police cross-hairs..no matter what
70443 #Antifa	September 22: Stop the fascist NVU in #Amsterdam! URL
90327 And that’s why you were at NYFW cause your such a class act.. getcho wack ass outta here URL
65545 #GreatestThingsAboutThe90s liberals weren’t unhinged
58543 #Conservatives We mus pray for liberals. They trooly kno knot watt they do. I was brot up socialist democrat	by my wonderful	but	ignorant parents. I served inda military. I learnd I can serve Christ	too. Eye reel -eyesed CONSERVATIVISM was more closely aligned w God.
79222 #disarmthem #antifa Please NO ONE be stupid enough to do this. Most of us DO NOT open carry	most of us carry concealed. Anyone stupid enough to do this	that is considered an act of aggression and you will be shot We also carry more than one weapon. We shoot to kill	not maim.
72401 @USER * Puerto Rico is destroyed; more than 3	000 die * Trump visits	and throws paper rolls at people * 11 months later	Puerto Rico is still waiting for help * Trump says everything is fine	and his visit was a great success 🤔
31354 All these sick ass ppl from school gave me something and now I have to chug down this nasty drink so it can go away🙃
29008 #Conservatives are #dumberthandogshit is the central point of my tweet
41590 @USER #Rosie makes me nauseous!🤮 URL
72523 #FemiNazis are Liberals so #MeToo only counts when they blame a non-Liberal man. #Bizarro #KAG2018 ❤️🇺🇸 URL
14640 #BREXIT deal HAS been reached - and will be unveiled at special summit in NOVEMBER	Has @USER sold out the #UK to the eu??? She better have not or the @USER are finished!! @USER URL
74909 #crazyredhead in very #angry at the #orange #cheeto Who claims to be our #president . She will never accept it. Denying all the lives lost in Puerto Rico? He is a #monster #… URL
96397 #EuropaLeague Song the EU	cash your remaining chips in and p*ss off 👍 You've played all your cards and liberals in the U.S too. Brexiteers and Trump takes it all so be nice eh and life'll be better for everyone. URL
34030 $1500 for a phone. You all are fucking dumb.
29113 #Kavanaugh The moment #BlaseyFord is exposed as a fraud	expect a new accuser to surface. Liberals are a one trick pony. #LiberalismIsAMentalDisorder
11286 #BCOG @USER she is cool	confident	cocky	and she kicks ass!!! @USER @USER @USER URL
41821 @USER oh fuck off 😂😂
76379 #LiberalHypocrisy #criminal #democrat #evidence #ellison #liberals #Hypocrites Keith Ellison domestic violence accuser says Democratic party doesn't believe her story URL
52080 #DemocratPartyOfDomesticTerrorists #Fascist #Antifa #FemiNazi Don't Just #WalkAway RUN! URL
51762 #auspol I don't know why he is still in his job. Seriously. URL
71592 #MAGA Tell me ONE good thing #trump has done as #president. I dare you! He is the worst president in history.
78688 #ConfirmKavanugh now	stall tactics are DC cronies only recourse. No more delays. #VoteRed to end this madness and to #MAGA
76135 @USER @USER @USER @USER Beats the hell NJ out of me lol. Dude already made the assumption that I'm antifa. He even ignored all the evidence to make that assumption.
30778 #StopEtchecopar? Fuck you all 🖕🖕🖕🖕🖕 Que florezcan mil Baby Etchecopar 🌻🌻🌻
22569 #Antifa are mentally unstable cowards	pretending to be relevant. URL
48938 @USER @USER And Browning looked like dog shit against the same FCS school. What’s your point?
41438 All two of them taste like ass. URL
73439 #DespicableDems lie again about rifles. Dem Distorted the Law to Push Gun-Control at Kavanaugh Confirmation URL via @USER
